# Supplementary material
Source: PubMed Central journal article supplement (PMC3945156)
Supplement: NIHMS543604-supplement-01.pdf [file NIHMS543604-supplement-01.pdf]

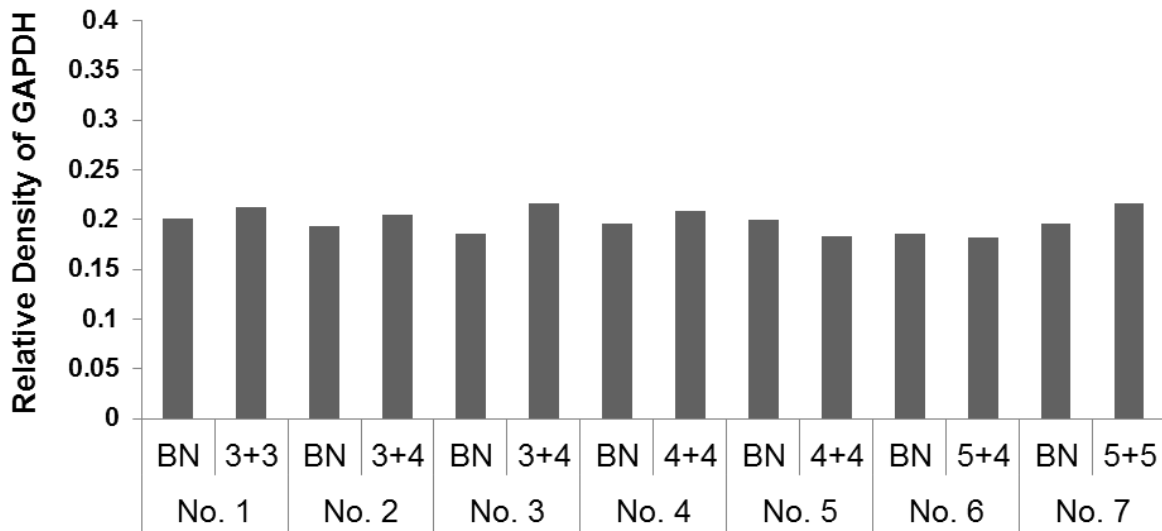

**Supplementary Figure 1. GAPDH protein expression levels in human prostate tissues.** Western blot analysis of GAPDH protein levels in BN tissues, and intermediate- and high grade-prostate cancer tissues that were used in Trx activity, TR protein expression, and TXNIP protein expression assays (Samples No.1-7). There were no significant differences in GAPDH expression among these tissues. BN is adjacent benign tissue; 4+4, 4+5, and 5+4 are high grade prostate cancer tissues; 3+3 and 3+4 are intermediate grade prostate cancer tissues.

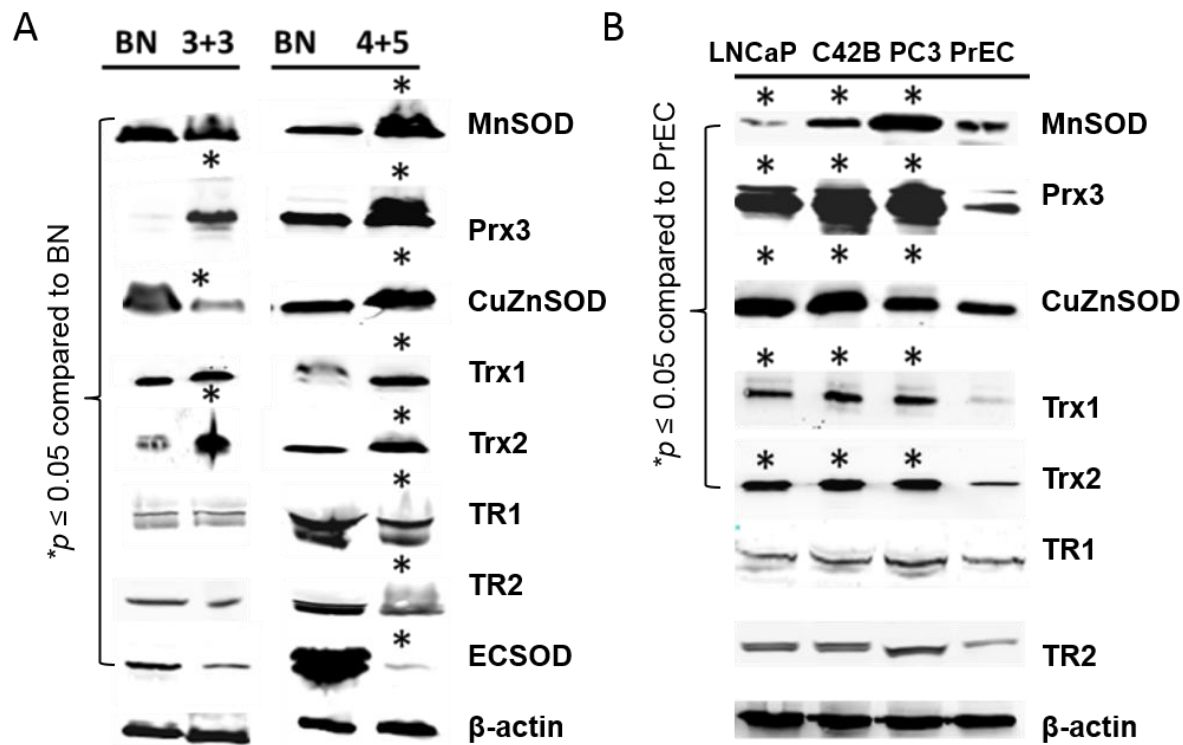

**Supplementary Figure 2. Alterations of selected antioxidant protein levels in human prostate tissues and cell lines.** Representative western blot analysis of mitochondrial (MnSOD, Prx3), cytoplasmic (Trx1, Trx2, TR1, TR2, CuZnSOD), and extracellular (ECSOD) antioxidant proteins in prostate cancer tissues (**A**) and prostate cancer cell lines (**B**). BN, adjacent benign tissue; 4+5, high grade prostate cancer tissues with Gleason scores of 4+4 to 4+5; 3+3, intermediate grade prostate cancer tissues with Gleason scores of 3+3 to 3+4. Blots are representative of at least four independent cases for human tissues and at least three separate experiments for prostate cancer cell lines. Band intensity and statistical values were calculated.

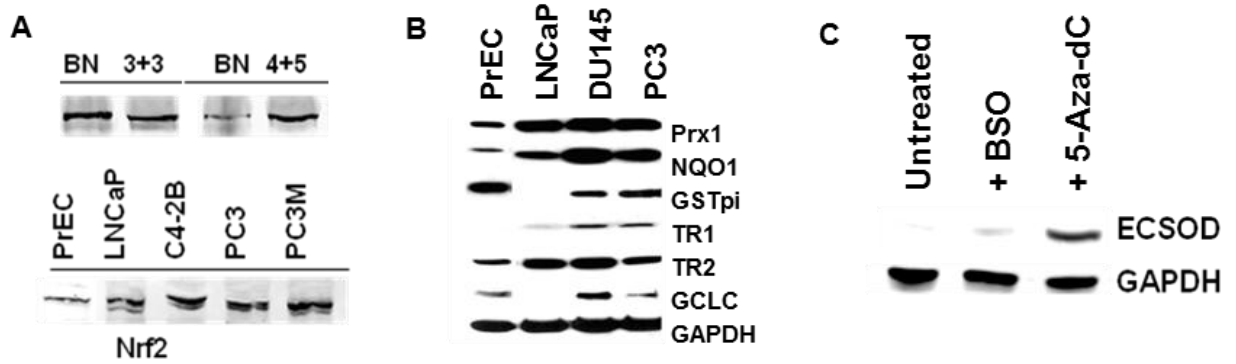

**Supplementary Figure 4. Possible regulation of Trx1 at the transcriptional level and ECSOD at the epigenetic level.** Western blot analysis of (A) Nrf2 in human prostate cancer tissues and cell lines and (B) Nrf2 downstream target proteins in prostate cancer cell lines. (Prx1, peroxiredoxin 1; NQO1, quinone oxidoreductase; GSTpi, glutathione-s-transferase pi; TR, thioredoxin reductase 1 or 2; GCLC, glutamate-cysteine ligase catalytic subunit). (C) Effect of 5-Aza-dC on ECSOD expression. PC3 cells were treated with 50  $\mu$ M buthionine sulfoximine (BSO) or 5  $\mu$ M 5-aza-2-deoxycytidine (5-Aza-dC) for 96 hr. Western blot analysis of ECSOD protein expression was performed.

**Supplementary Table 1.** Human prostate cancer tissues used in the studies

| No | Organs   | Pathologic Diagnosis | Experiment                                                                                                                                                                      |
|----|----------|----------------------|---------------------------------------------------------------------------------------------------------------------------------------------------------------------------------|
| 1  | Prostate | Benign               | Trx1 western blot, Trx1 redox western blot, TR activity, TXNIP activity, Trx activity                                                                                           |
|    | Prostate | Gleason 3+3          |                                                                                                                                                                                 |
| 2  | Prostate | Benign               | Trx1 western blot, Trx1 redox western blot, TR activity, TXNIP activity, Trx activity                                                                                           |
|    | Prostate | Gleason 3+4          |                                                                                                                                                                                 |
| 3  | Prostate | Benign               | Trx1 western blot, Trx1 redox western blot, TR activity, TXNIP activity, Trx activity                                                                                           |
|    | Prostate | Gleason 3+4          |                                                                                                                                                                                 |
| 4  | Prostate | Benign               | Trx1 western blot, Trx1 redox western blot, TR activity, TXNIP activity, Trx activity                                                                                           |
|    | Prostate | Gleason 4+4          |                                                                                                                                                                                 |
| 5  | Prostate | Benign               | Trx1 western blot, Trx1 redox western blot, TR activity, TXNIP activity, Trx activity                                                                                           |
|    | Prostate | Gleason 4+4          |                                                                                                                                                                                 |
| 6  | Prostate | Benign               | Trx1 western blot, Trx1 redox western blot, TR activity, TXNIP activity, Trx activity<br>MnSOD western blot and activity gel<br>ECSOD activity gel                              |
|    | Prostate | Gleason 5+4          |                                                                                                                                                                                 |
| 7  | Prostate | Benign               | Trx1 western blot, Trx1 redox western blot, TR activity, TXNIP activity, Trx activity                                                                                           |
|    | Prostate | Gleason 5+5          |                                                                                                                                                                                 |
| 8  | Prostate | Benign               | Trx1 western blot                                                                                                                                                               |
|    | Prostate | Gleason 4+5          |                                                                                                                                                                                 |
| 9  | Prostate | Benign               | Trx1 western blot, Trx1 redox western blot<br>MnSOD western blot, IP blot, and activity gel<br>ECSOD western blot and activity gel<br>Prx1, 2, 3, and 4 and PrxSO3 western blot |
|    | Prostate | Gleason 4+5          |                                                                                                                                                                                 |
| 10 | Prostate | Benign               | Trx1 western blot, Trx1 redox western blot<br>MnSOD western blot, IP blot, and activity gel<br>ECSOD activity<br>Prx1, 2, 3, and 4 and PrxSO3 western blot                      |
|    | Prostate | Gleason 4+5          |                                                                                                                                                                                 |
| 11 | Prostate | Benign               | Trx1 western blot, Trx1 redox western blot<br>MnSOD western blot, IP blot, and activity gel<br>ECSOD western blot and activity gel<br>Prx1, 2, 3, and 4 and PrxSO3 western blot |
|    | Prostate | Gleason 4+5          |                                                                                                                                                                                 |
| 12 | Prostate | Benign               | Trx1 western blot<br>MnSOD western blot and activity gel<br>ECSOD western blot and activity gel<br>Prx 2 and 3 and PrxSO3 western blot                                          |
|    | Prostate | Gleason 4+4          |                                                                                                                                                                                 |
| 13 | Prostate | Benign               | Trx1 western blot, Trx1 redox western blot                                                                                                                                      |

|    |          |             |                                                                                                                                    |
|----|----------|-------------|------------------------------------------------------------------------------------------------------------------------------------|
|    | Prostate | Gleason 4+4 | MnSOD western blot and activity gel<br>ECSOD western blot and activity gel<br>Prx1, 2, 3, and 4 and PrxSO3 western blot            |
| 14 | Prostate | Benign      | Trx1 western blot<br>MnSOD western blot, IP blot, and activity gel                                                                 |
|    | Prostate | Gleason 3+4 |                                                                                                                                    |
| 15 | Prostate | Benign      | Trx1 western blot<br>MnSOD western blot and activity gel<br>ECSOD activity gel                                                     |
|    | Prostate | Gleason 3+4 |                                                                                                                                    |
| 16 | Prostate | Benign      | Trx1 western blot, Trx1 redox western blot<br>MnSOD western blot, IP blot, and activity gel<br>ECSOD western blot and activity gel |
|    | Prostate | Gleason 3+4 |                                                                                                                                    |
| 17 | Prostate | Benign      | Trx1 western blot, Trx1 redox western blot<br>MnSOD western blot, IP blot, and activity gel<br>ECSOD activity                      |
|    | Prostate | Gleason 3+4 |                                                                                                                                    |
| 18 | Prostate | Benign      | Trx1 western blot<br>ECSOD western blot and activity gel                                                                           |
|    | Prostate | Gleason 3+3 |                                                                                                                                    |
| 19 | Prostate | Benign      | Trx1 western blot, Trx1 redox western blot<br>MnSOD western blot and activity gels<br>ECSOD western blot and activity gel          |
|    | Prostate | Gleason 3+3 |                                                                                                                                    |
| 20 | Prostate | Benign      | Trx1 western blot<br>MnSOD western blot<br>ECSOD western blot                                                                      |
|    | Prostate | Gleason 3+3 |                                                                                                                                    |
| 21 | Prostate | Benign      | Trx1 western blot<br>MnSOD western blot and activity gels<br>ECSOD western blot                                                    |
|    | Prostate | Gleason 3+3 |                                                                                                                                    |
| 22 | Prostate | Benign      | MnSOD western blot and activity gel, Trx1 redox<br>western blot                                                                    |
|    | Prostate | Gleason 3+3 |                                                                                                                                    |

**Supplementary Table 2. The coefficient of Determination ( $R^2$ ) of posttranslational modifications of MnSOD versus MnSOD activity in human prostate cancer tissues.**  $R^2$  indicates regression relation of nitrotyrosine or methylated-lysine in MnSOD versus MnSOD activity. High grade prostate tissues (4+4 to 4+5) demonstrate the most significant  $R^2$  (asterisks) which indicates an increase in nitrotyrosine or methylated-lysine in MnSOD. These post-translational modifications are most likely responsible for inactivation of MnSOD in prostate cancer tissues when compare to BN tissues. BN, adjacent benign tissue; 4+4 to 4+5, high grade prostate cancer tissues with Gleason scores of 4+4 to 4+5; 3+3 to 3+4, intermediate grade prostate cancer tissues with Gleason scores of 3+3 to 3+4.

| Prostate cancer   |     | Coefficient of Determination ( $R^2$ )                             |                                                                        |
|-------------------|-----|--------------------------------------------------------------------|------------------------------------------------------------------------|
|                   |     | Increasing of Nitrotyrosine MnSOD vs. decreasing of MnSOD activity | Increasing of Methylated lysine MnSOD vs. decreasing of MnSOD activity |
| <b>3+3 to 3+4</b> | BN  | 0.76                                                               | 0.59                                                                   |
|                   | PCa | 0.6                                                                | 0.64                                                                   |
| <b>4+4 to 4+5</b> | BN  | 0.87                                                               | 0.01                                                                   |
|                   | PCa | <b>0.99*</b>                                                       | <b>0.95*</b>                                                           |
| <b>3+3 to 4+5</b> | BN  | 0.31                                                               | 0.06                                                                   |
|                   | PCa | 0.47                                                               | 0.64                                                                   |
